# Supplementary material for: Conformational landscape of the epidermal growth factor receptor kinase reveals a mutant specific allosteric pocket
Source: PubMed Central journal article supplement — Chem Sci. 2018 May 16;9(23):5212–22. doi: 10.1039/c8sc01262h (PMC6001276; doi:10.1039/c8sc01262h), 2018-05-16
Supplement: SC-009-C8SC01262H-s001.pdf [file SC-009-C8SC01262H-s001.pdf]

## Supporting information

### Conformational landscape of Epidermal growth factor receptor

#### kinase reveals a mutant specific allosteric pocket

Srinivasaraghavan Kannan<sup>1\*</sup>, Gireedhar Venkatachalam<sup>2</sup>, Hong Hwa Lim<sup>2</sup>, Uttam Surana<sup>2</sup>,  
Chandra Verma<sup>1,3,4\*</sup>

<sup>1</sup>Bioinformatics Institute (BII), A\*STAR, 30 Biopolis Street, 07-01 matrix, Singapore 138671

<sup>2</sup>Institute of Molecular and Cell biology (IMCB), A\*STAR, 61 Biopolis Drive, 06-01  
Proteos, Singapore 138673

<sup>3</sup>School of Biological Sciences, Nanyang Technological University, 60 Nanyang Drive,  
Singapore 637551, Singapore

<sup>4</sup>Department of Biological Sciences, National University of Singapore, 14 Science Drive 4,  
Singapore 117543, Singapore

**\*Corresponding authors:** Srinivasaraghavan Kannan, Bioinformatics Institute (A\*STAR),  
30, Biopolis Street, 07-01 Matrix, Singapore 138671, Singapore, E-mail: [raghavk@bii.a-star.edu.sg](mailto:raghavk@bii.a-star.edu.sg); Tel: +65 6478 8353; Fax: +65 6478 9048. Chandra S. Verma, Bioinformatics  
Institute (A\*STAR), 30, Biopolis Street, 07-01 Matrix, Singapore 138671, Singapore, E-mail:  
[chandra@bii.a-star.edu.sg](mailto:chandra@bii.a-star.edu.sg); Tel: +65 6478 8273; Fax: +65 6478 9048.

## Methods

### Computational methods

MD simulations and analyses were carried out with the *pmemd.cuda* module of the program Amber14 [1]. The partial charges and force field parameters for each inhibitor were generated using the *Antechamber* module in Amber. All atom versions of the Amber03 force field (ff03) [2] and the general Amber force field (GAFF) [3] were used for the protein and the inhibitors respectively. The *Xleap* module was used to prepare the system for the MD simulations. All the simulation systems were neutralized with appropriate numbers of counter ions. Each neutralized system was solvated in an octahedral box with TIP3P [4] water molecules, leaving at least 10Å between the solute atoms and the borders of the box. All MD simulations were carried out in explicit solvent at 300K. During the simulations, the long-range electrostatic interactions were treated with the particle mesh Ewald [5] method using a real space cut off distance of 9Å. The Settle [6] algorithm was used to constrain bond vibrations involving hydrogen atoms, which allowed a time step of 2fs during the simulations.

The models of the complexes of EAI045 (with *EGFR<sup>L858R</sup>* and *EGFR<sup>L861Q</sup>*) were generated as follows: MD simulations of the apo forms of *EGFR<sup>L858R</sup>* and *EGFR<sup>L861Q</sup>* were carried out and the sampled conformations were subject to RMSD-based clustering. Representatives of the top 10 clusters of each protein were then taken and EAI045 was docked to each chosen conformation. From these docked complexes, we chose a model from the EAI045 - *EGFR<sup>L858R</sup>* states and a model from the EAI045 - *EGFR<sup>L861Q</sup>* states in which the bound EAI045 adopted a conformation similar (closest rmsd was ~0.8 Å) to its binding mode seen in the published co-crystal structure of EAI001 complexed with the *EGFR<sup>T790M/V948R</sup>* (PDB code 5d41) and subsequently subjected these two chosen models to MD simulations.

For each system, the solvent molecules and counter ions were initially relaxed using energy minimization with restraints on the protein and inhibitor atoms. This was followed by unrestrained energy minimization to remove any steric clashes. Subsequently the system was gradually heated from 0 to 300 K using MD simulations with positional restraints (force constant: 50 kcal mol<sup>-1</sup> Å<sup>-2</sup>) on protein and inhibitor atoms over a period of 0.25 ns allowing water molecules and ions to move freely. During an additional 0.25 ns, the positional restraints were gradually reduced followed by a 2 ns unrestrained MD simulation to equilibrate all the atoms. Finally, each system was subject to production simulations and the details are listed in Table S2.

Analysis of the MD simulations was carried out by examining several properties. Root mean square deviation (RMSD) of the sampled conformations against the starting structure and average atomic fluctuations (Root mean square fluctuations or RMSF) over all sampled conformations during the stable parts of the production phases of the MD simulations were calculated using the *ptraj* module in Amber. Solvent Accessible Surface Area (SASA) was computed using NACCESS [7]. Volume of the allosteric pocket was calculated using the *trj\_cavity* program [8]. Evolution of the secondary structures was calculated using the *dssp* program [9]. In the case of *EGFR<sup>WT</sup>* (inactive), *EGFR<sup>L858R</sup>* (inactive), *EGFR<sup>T790M</sup>* (inactive) *EGFR<sup>L858R/T790M</sup>* and *EGFR<sup>L861Q</sup>*, analysis was carried out over the 1 μs simulation trajectory, for the other systems, either the 100ns or the 250ns production simulations were used. Three parameters: 1. backbone dihedrals of residues that form the short α-helix; 2. volume of the allosteric pocket; 3. rmsd of the short α-helix), were used for constructing the Free Energy Surfaces (FES). The backbone dihedrals values were calculated for each of the 7 amino acids that make up the short α-helix and averaged for each conformation sampled during the 1 μs MD simulations. RMSD (with respect to the starting folded α-helical conformation) of

residues from 857 to 863 that form the short  $\alpha$ -helix was calculated for all the conformations sampled during the 1  $\mu$ s MD simulations. The allosteric pocket was defined by residues that are within 6 Å of the EAI045 inhibitor binding site in the crystal structure 5D41.pdb and the volume of the pocket was calculated using the program *trj\_cavity* [8] from the conformations sampled during the 1  $\mu$ s MD simulations of the respective systems. Simulation trajectories were visualized using VMD [10] and figures were generated using PyMOL [11].

### Energy Calculations

The binding free energies of complexes EAI045 - *EGFR*<sup>L858R</sup> and EAI045 - *EGFR*<sup>L861Q</sup> were calculated using the MMPBSA (Molecular Mechanics Poisson–Boltzmann Surface Area) methodology [12] implemented in AMBER 14 [1]. 250 conformations from the last 500 ns of the MD simulations of each EAI045 - *EGFR*<sup>L858R</sup> and EAI045 - *EGFR*<sup>L861Q</sup> complex were taken and water molecules and counterions removed. Binding free energies ( $\Delta G_{\text{bind}}$ ) were calculated for each conformation using:

$$\Delta G_{\text{bind}} = G_{\text{complex}} - (G_{\text{receptor}} + G_{\text{ligand}}) \quad (1)$$

where

$$\Delta G_{\text{bind}} = \Delta G_{\text{MM}} + \Delta G_{\text{sol}} - T\Delta S \quad (2)$$

$\Delta G_{\text{MM}}$  is the change in the molecular mechanics energy upon complexation in the gas phase,  $\Delta G_{\text{sol}}$  is the change in solvation free energy and  $T\Delta S$  is the change of conformational entropy associated with ligand binding. The molecular mechanics free energy ( $\Delta G_{\text{MM}}$ ) is further split into Van der Waals ( $\Delta G_{\text{vdw}}$ ) and electrostatic ( $\Delta G_{\text{ele}}$ ) energies:

$$\Delta G_{\text{MM}} = \Delta G_{\text{ele}} + \Delta G_{\text{vdw}} \quad (3)$$

The solvation free energy  $\Delta G_{\text{sol}}$  arises from polar (electrostatic) solvation free energy ( $\Delta G_{\text{PB}}$ ) and nonpolar solvation free energy ( $\Delta G_{\text{SA}}$ ) as in eq 4:

$$\Delta G_{\text{sol}} = \Delta G_{\text{PB}} + \Delta G_{\text{SA}} \quad (4)$$

$\Delta G_{\text{PB}}$  is computed by solving the linearized Poisson – Boltzmann (PB) equation using Parse radii and a solvent probe radius of 1.4 Å. In these calculations, the dielectric constant was set to 1.0 for the interior of the solutes and 80.0 for the solvent.  $\Delta G_{\text{SA}}$  was determined using a solvent accessible surface area (SASA)–dependent term as in eq 5:

$$\Delta G_{\text{SA}} = \gamma \times \text{SASA} + \beta \quad (5)$$

where  $\gamma$  is the surface tension proportionality constant and was set to 0.00542 kcal/(mol·Å<sup>-2</sup>), and  $\beta$  is the offset value, which was 0.92 kcal/mol here.

The entropy term ( $-T\Delta S$ ) was not computed, therefore the binding free energy calculated here corresponds to only the enthalpic contribution.

## Experimental Methods

*In vitro* binding assay was performed using KINOMEscan™ at the company DiscoverX. Briefly, the assay uses DNA-tagged kinase, immobilized ligand, and a test compound to quantitate the ability of a compound to compete with an immobilized ligand. Kinases required for the study were prepared in an *E.coli* BL21 strain or HEK293 cells and were further tagged with DNA for qPCR detection. *EGFR*<sup>WT</sup>, *EGFR*<sup>L858R</sup>, *EGFR*<sup>19del</sup> and *EGFR*<sup>L861Q</sup> kinases were chosen for this study. Streptavidin-coated magnetic beads were treated with biotinylated kinase specific ligands for 30 min at RT to generate affinity resins for kinase assays. The compound EAI045 was bought from Selleck (catalog number - S8242). Binding reactions were assembled by combining kinases, liganded affinity beads,

and test compounds in 1x binding buffer (20% SeaBlock, 0.17x PBS, 0.05% Tween 20, 6 mM DTT). Test compounds were prepared as 111X stocks in 100% DMSO. Kds were determined using an 11-point 3-fold compound dilution series with three DMSO control points. All compounds for Kd measurements are distributed by acoustic transfer (non-contact dispensing) in 100% DMSO. The compounds were then diluted directly into the assays such that the final concentration of DMSO was 0.9%. All reactions were performed in polypropylene 384-well plates. Each well contained a final volume of 0.02 ml. The assay plates were incubated at RT with shaking for 1 hour and the affinity beads were washed with wash buffer (1x PBS, 0.05% Tween 20). The beads were then re-suspended in elution buffer (1x PBS, 0.05% Tween 20, 0.5  $\mu$ M non-biotinylated affinity ligand) and incubated at RT with shaking for 30 min. The kinase concentration in the eluates was measured by qPCR.

1. Case, D. et al. Amber 14. University of California, San Francisco.
2. Ponder, J.W., Case, D.A. Force fields for protein simulations. *Adv. Prot. Chem.* **2003**, 66, 27-85.
3. Wang, J., Wolf, R.M., Caldwell, J.W., Kollman, P.A., Case, D.A. Development and testing of a general amber force field. *J. Comput. Chem.* **2004**, 25, 1157–1174
4. Jorgensen, W.L., Chandrasekhar, J., Madura, J.D., Impey, R.W., Klein, M.L. Comparison of simple potential functions for simulating liquid water. *J. Chem. Phys.* **1983**, 79, 926–935.
5. Darden, T., York, D., Pedersen, L. Particle mesh Ewald: An N<sub>2</sub>log(N) method for Ewald sums in large systems. *J. Chem. Phys.* **1993**, 98, 10089–10092.
6. Miyamoto, S., Kollman, P.A. Settle: An analytical version of the SHAKE and RATTLE algorithm for rigid water models. *J. Comput. Chem.* **1992**, 13, 952–962.
7. Hubbard, S., Thornton, J. NACCESS, Computer Program. **1993**, Department of Biochemistry Molecular Biology, University College London
8. Paramo, T., East, A., Garzon, D., Ulmschneider, M. B., Bond, P. J. Efficient Characterization of Protein Cavities within Molecular Simulation Trajectories: trj\_cavity *J. Chem. Theory Comput.* **2014**, 10, 2151– 2164

9. Touw, W.G., et al. A series of PDB related databases for everyday needs. *Nucleic Acids Research*. **2015**, 43, D364-D368
10. Humphrey, W., Dalke, A., Schulten, K. VMD—visual molecular dynamics. *J. Mol. Graph.* **1996**, 14, 33–38.
11. De Lano, W. The PyMOL molecular graphics system. **2002**, San Carlos CA, USA: De Lano Scientific.
12. Miller, Bill R.; McGee, T. Dwight; Swails, Jason M.; Homeyer, Nadine; Gohlke, Holger; Roitberg, Adrian E. MMPBSA.py: An Efficient Program for End-State Free Energy Calculations. *J. Chem. Theory Comput.* **2012**, 8, 3314–3321.

**Table S1:** Details of the systems studied here. If the crystal structure was used then its PDB code is given, else if a homology based model was constructed, then it is represented as Model

| System                             | Active form        | Inactive form      |
|------------------------------------|--------------------|--------------------|
| <i>EGFR<sup>WT</sup></i>           | 2ITX <sup>13</sup> | 2GS7 <sup>16</sup> |
| <i>EGFR<sup>L858R</sup></i>        | 2ITV <sup>13</sup> | Model              |
| <i>EGFR<sup>T790M</sup></i>        | 2JIT <sup>14</sup> | 4I24 <sup>17</sup> |
| <i>EGFR<sup>L858R/T790M</sup></i>  | 5EDP <sup>15</sup> | Model              |
| <i>EGFR<sup>L681Q</sup></i>        | Model              | Model              |
| <i>EGFR<sup>19del</sup></i>        | Model              | Model              |
| <i>EGFR<sup>L858R</sup> + SNPs</i> | -                  | Model              |
| <i>EGFR<sup>WT</sup> + SNPs</i>    | -                  | Model              |

- 13 Yun CH, Boggon TJ, Li Y, Woo MS, Greulich H, Meyerson M et al. Structures of Lung Cancer-Derived *EGFR* Mutants and Inhibitor Complexes: Mechanism of Activation and Insights into Differential Inhibitor Sensitivity. *Cancer Cell* **2007**; 11(3), 217-227.
- 14 Yun CH et al, The T790M Mutation in Egfr Kinase Causes Drug Resistance by Increasing the Affinity for ATP. *Proc.Natl.Acad.Sci.USA*, **2008** 105: 2070
- 15 Hanan EJ, et al. 4-Aminoindazolyl-dihydrofuro[3,4-d]pyrimidines as non-covalent inhibitors of mutant epidermal growth factor receptor tyrosine kinase. *Bioorg.Med.Chem.Lett.* **2016**, 26: 534-539.

- 16 Zhang X, Gureasko J, Shen K, Cole PA, Kuriyan J. An Allosteric Mechanism for Activation of the Kinase Domain of Epidermal Growth Factor Receptor. *Cell*, **2006**, 125, 1137-1149.
- 17 Gajiwala KS et al. Insights into the Aberrant Activity of Mutant EGFR Kinase Domain and Drug Recognition. *Structure*, **2013**, 21: 209-219.

**Table S2:** Simulations details of all the systems. The simulation timescale refers to the length of the production simulations. The No of simulations refers to the number of simulations, where each simulation was propagated with a different set of initial velocities.

| S.no | System                            | Conformation | Apo/complex | Simulation timescale | No of simulations |
|------|-----------------------------------|--------------|-------------|----------------------|-------------------|
| 1    | <i>EGFR<sup>WT</sup></i>          | Active       | Apo         | 100 ns               | 3                 |
| 2    | <i>EGFR<sup>WT</sup></i>          | Inactive     | Apo         | 1 $\mu$ s            | 2                 |
| 3    | <i>EGFR<sup>L858R</sup></i>       | Active       | Apo         | 100 ns               | 3                 |
| 4    | <i>EGFR<sup>L858R</sup></i>       | Inactive     | Apo         | 1 $\mu$ s, 4 $\mu$ s | 2, 1              |
| 5    | <i>EGFR<sup>T790M</sup></i>       | Active       | Apo         | 100 ns               | 3                 |
| 6    | <i>EGFR<sup>T790M</sup></i>       | Inactive     | Apo         | 1 $\mu$ s, 4 $\mu$ s | 2, 1              |
| 6    | <i>EGFR<sup>L858R/T790M</sup></i> | Active       | Apo         | 100 ns               | 3                 |
| 7    | <i>EGFR<sup>L858R/T790M</sup></i> | Inactive     | Apo         | 1 $\mu$ s, 4 $\mu$ s | 2, 1              |
| 8    | <i>EGFR<sup>L681Q</sup></i>       | Active       | Apo         | 100 ns               | 3                 |
| 9    | <i>EGFR<sup>L681Q</sup></i>       | Inactive     | Apo         | 1 $\mu$ s            | 2                 |
| 10   | <i>EGFR<sup>L858R</sup></i>       | Inactive     | Complex     | 100ns                | 3                 |
| 11   | <i>EGFR<sup>L858R/T790M</sup></i> | Inactive     | Complex     | 100ns                | 3                 |
| 12   | <i>EGFR<sup>L861Q</sup></i>       | Inactive     | Complex     | 100ns                | 3                 |
| 13   | <i>EGFR<sup>19del</sup></i>       | Active       | Apo         | 250ns                | 3                 |
| 14   | <i>EGFR<sup>19del</sup></i>       | Inactive     | Apo         | 250ns                | 3                 |
| 15   | <i>EGFR<sup>WT+SNPs</sup></i>     | Inactive     | Apo         | 250ns                | 3                 |
| 16   | <i>EGFR<sup>L858R+SNPs</sup></i>  | Inactive     | Apo         | 250ns                | 3                 |



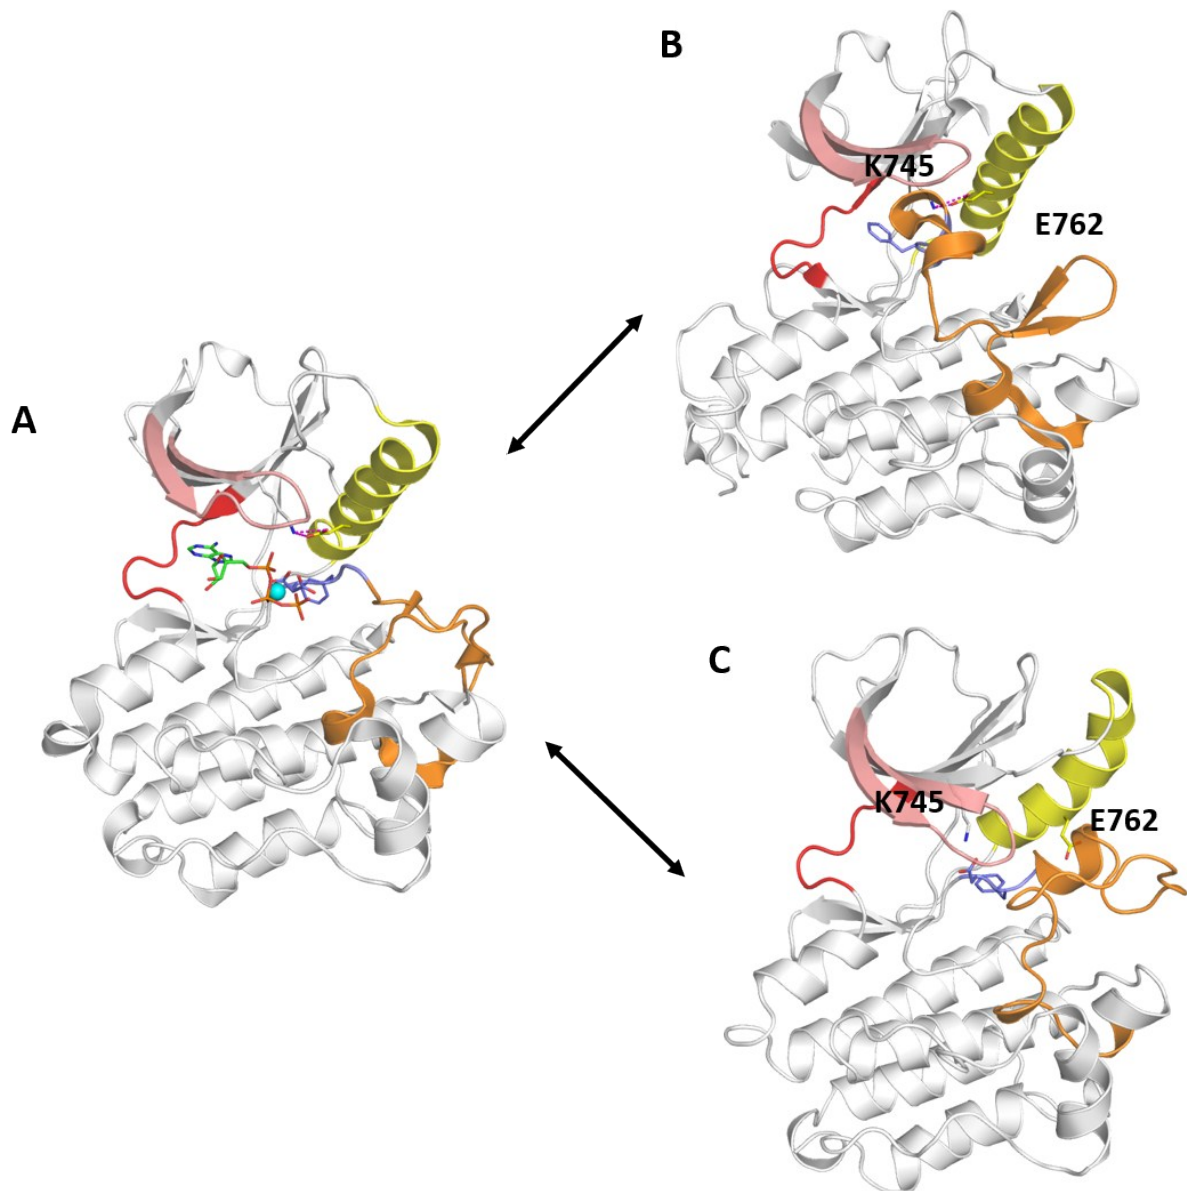

**Figure S1:** (A) Overview of the structure of *EGFR<sup>WT</sup>* kinase in its active form (B) and inactive form (C) with the Glycine rich P-loop (brown),  $\alpha$ C – helix (yellow), hinge region (red), DFG motif (blue) and activation loop including the short  $\alpha$ -helix in the inactive form (orange) highlighted. The catalytically important salt bridge (Lys745 – Glu762) interaction is highlighted (magenta, dashed lines) in the active form of kinase (B). Colouring of the kinase structure is the same as in Figure 1.

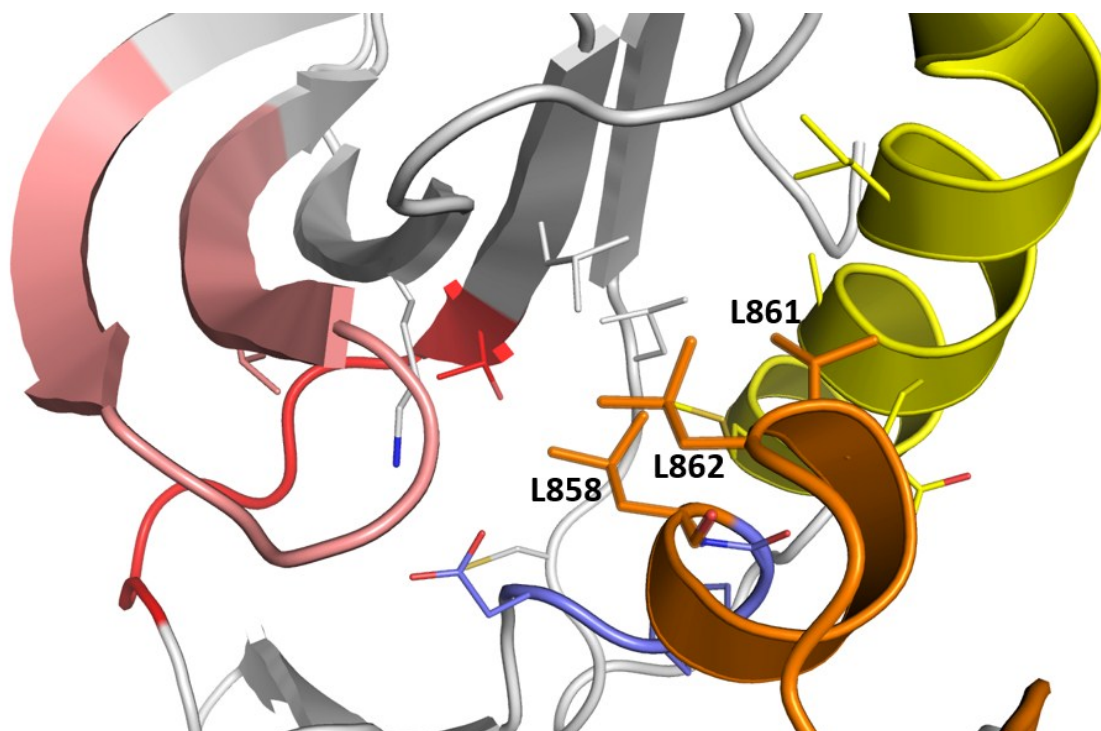

**Figure S2:** (A) Structure of the *EGFR<sup>WT</sup>* kinase in its inactive form with Leu858, Leu861 and Leu862 highlighted as sticks. Colouring of the kinase structure is the same as in Figure 1.

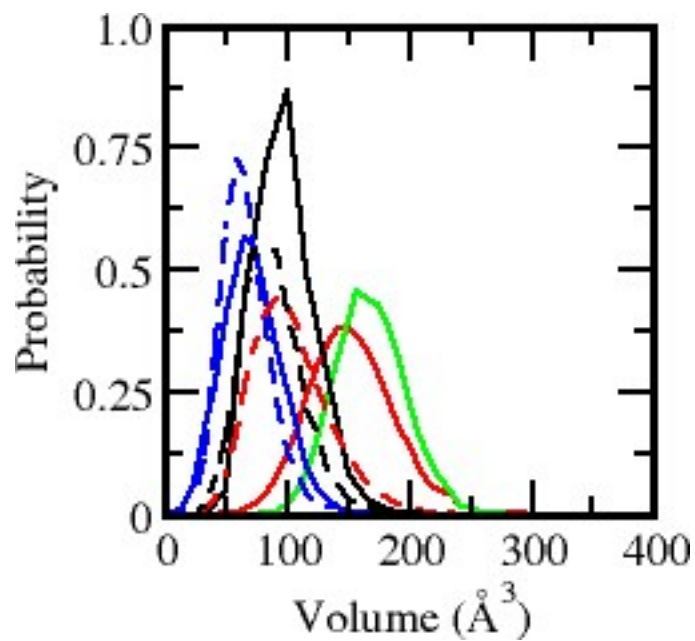

**Figure S3:** Distributions of volumes of the allosteric pockets calculated from the conformations sampled during the MD simulations of EGFR<sup>WT</sup> (black) EGFR<sup>L858R</sup> (red) EGFR<sup>L858R</sup>-EAI045 (green) EGFR<sup>del19</sup> (blue) in the active (dashed lines) and inactive (continuous lines) conformations.

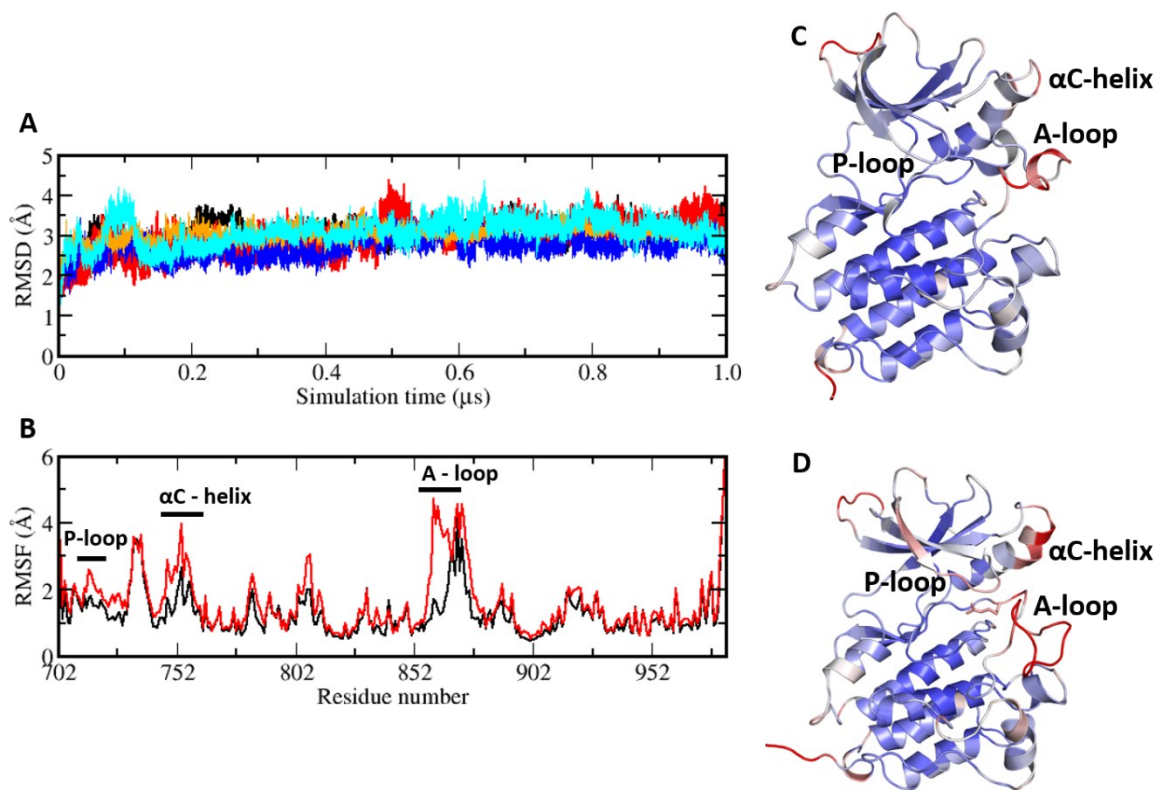

**Figure S4:** (A) Root Mean Squared Deviation (RMSD) as a function of time, averaged over all non-hydrogen atoms for each conformation sampled during the 1 $\mu$ s MD simulations of *EGFR*<sup>WT</sup> (black), *EGFR*<sup>L858R</sup> (red), *EGFR*<sup>L861Q</sup> (cyan), *EGFR*<sup>L858R/T790M</sup> (orange) and *EGFR*<sup>T790M</sup> (blue); (B) Root Mean Squared Fluctuations (RMSF) of the non-hydrogen atoms averaged over all the conformations sampled during the 1 $\mu$ s MD simulations of *EGFR*<sup>WT</sup> (black) and *EGFR*<sup>L858R</sup> (red); (C, D) Cartoon representations of (C) *EGFR*<sup>WT</sup> (D) *EGFR*<sup>L858R</sup> kinase domains coloured according to the flexibility (RMSF) with blue to red corresponding to low to high flexibility (4Å).

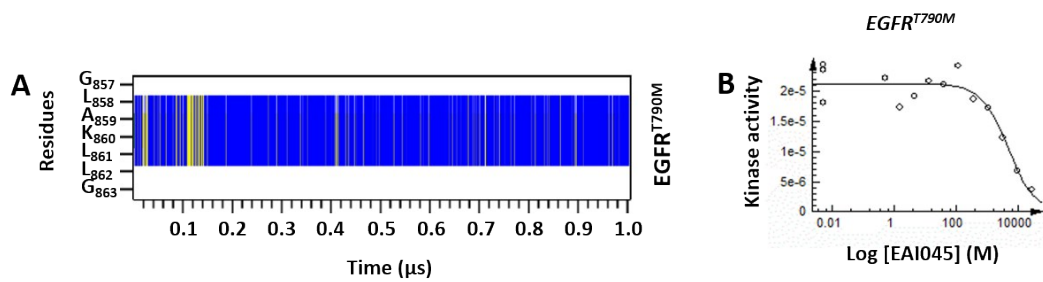

**Figure S5:** (A) Secondary structure evolution (blue:  $\alpha$ -helix, yellow:  $\beta$ -strand, gray:  $3_{10}$ -helix, green: turn, white: coil) of the short  $\alpha$  helix (y-axis) during the MD simulations of EGFR<sup>T790M</sup>.

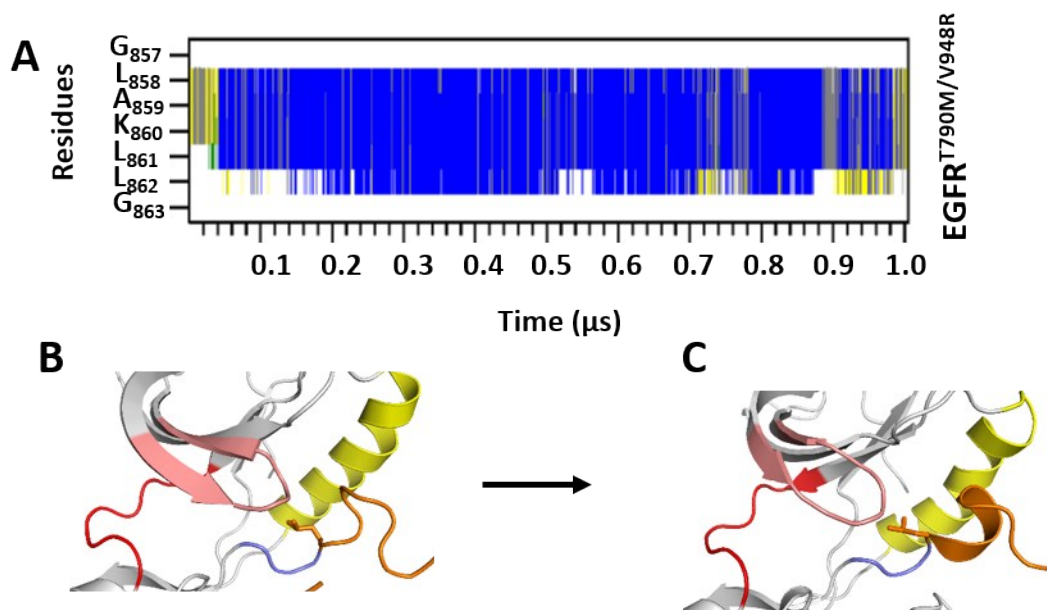

**Figure S6:** (A) Secondary structure evolution (blue:  $\alpha$ -helix, yellow:  $\beta$ -strand, gray:  $3_{10}$ -helix, green: turn, white: coil) of the short  $\alpha$  helix (y-axis) during the MD simulations of EGFR<sup>T790M/V948R</sup>. Crystal structure (B) and MD snapshot (C) of the EGFR<sup>T790M/V948R</sup> kinase with  $\alpha$ C – helix (Orange), short  $\alpha$ -helix (magenta) and Leu858 shown as sticks.

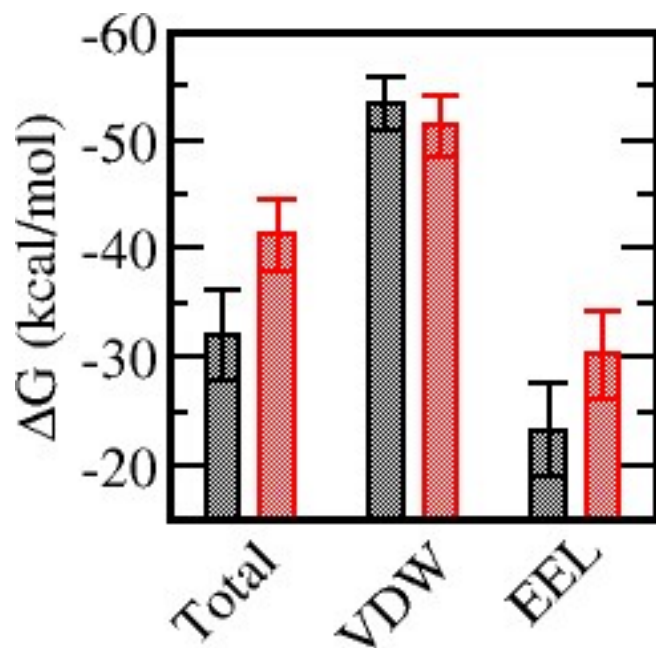

**Figure S7:** Calculated MMPBSA binding free energies ( $\Delta G$ ) for the complexes of EAI045 with EGFR<sup>L858R</sup> (black) and EGFR<sup>L681Q</sup> (red). The van der Waals (vdW) and Electrostatics (EEL) contributions are shown for both systems.

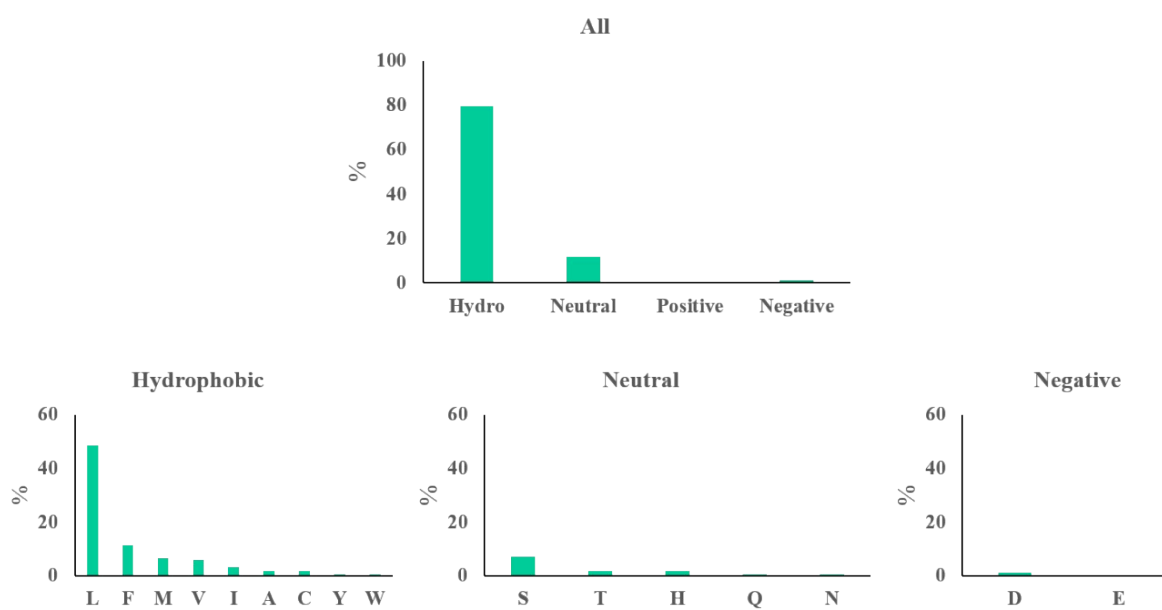

**Figure S8:** Residue conservation at position 858 (number corresponds to the *EGFR<sup>WT</sup>* kinase) across the human kinome. (Top) distribution of all amino acids based on chemical property (Bottom) distributions of individual amino acids based on chemical property.



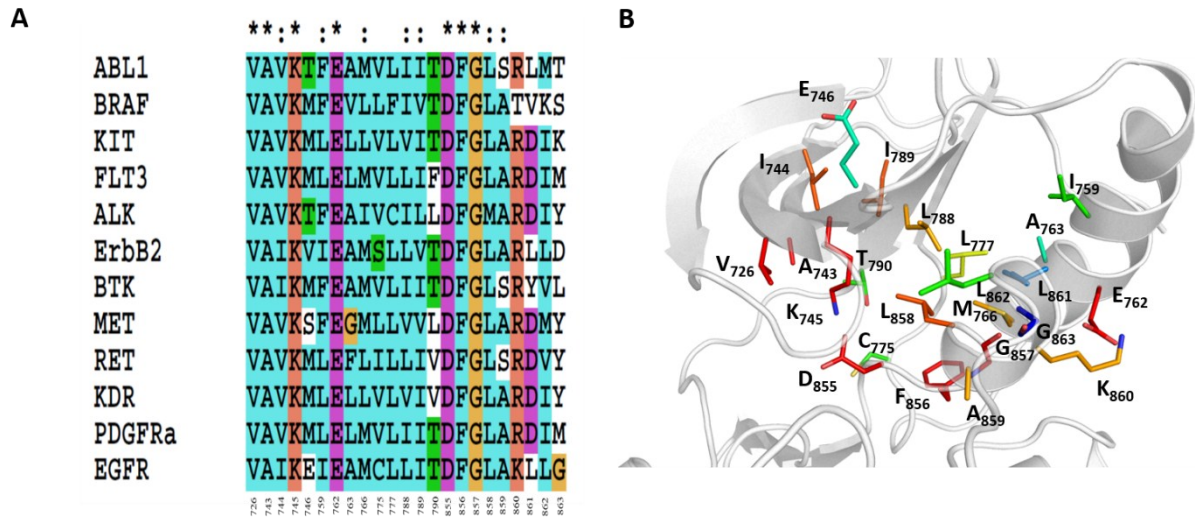

**Figure S9:** (A) Multiple sequence alignment (global alignment) of residues from the hydrophobic allosteric pocket of kinases that account for the vast majority of the highly oncogenic mutations. Number at the bottom of the alignment corresponds to the *EGFR<sup>WT</sup>* kinase. The hydrophobic pocket is well conserved among these kinases with variations observed mostly towards the C-terminus of the short  $\alpha$ -helix (residue 861 to 863) from the A-loop. (B) Conservation of residues from the hydrophobic allosteric pocket of kinases (ABL1, BRAF, KIT, FLT3, PDGFR $\alpha$ , ALK, ErbB2, BTK, MET, KDR, EGFR) mapped onto the allosteric pocket of *EGFR<sup>WT</sup>* in its inactive form. Colouring scheme from blue to red corresponds to the conservation score from 0 to 10, with red being the most conserved and blue being the least conserved.
